# Supplementary material
Source: MDPI journal article supplement (https://www.mdpi.com/2072-4292/9/7/707)
Supplement: s1 [file s1]

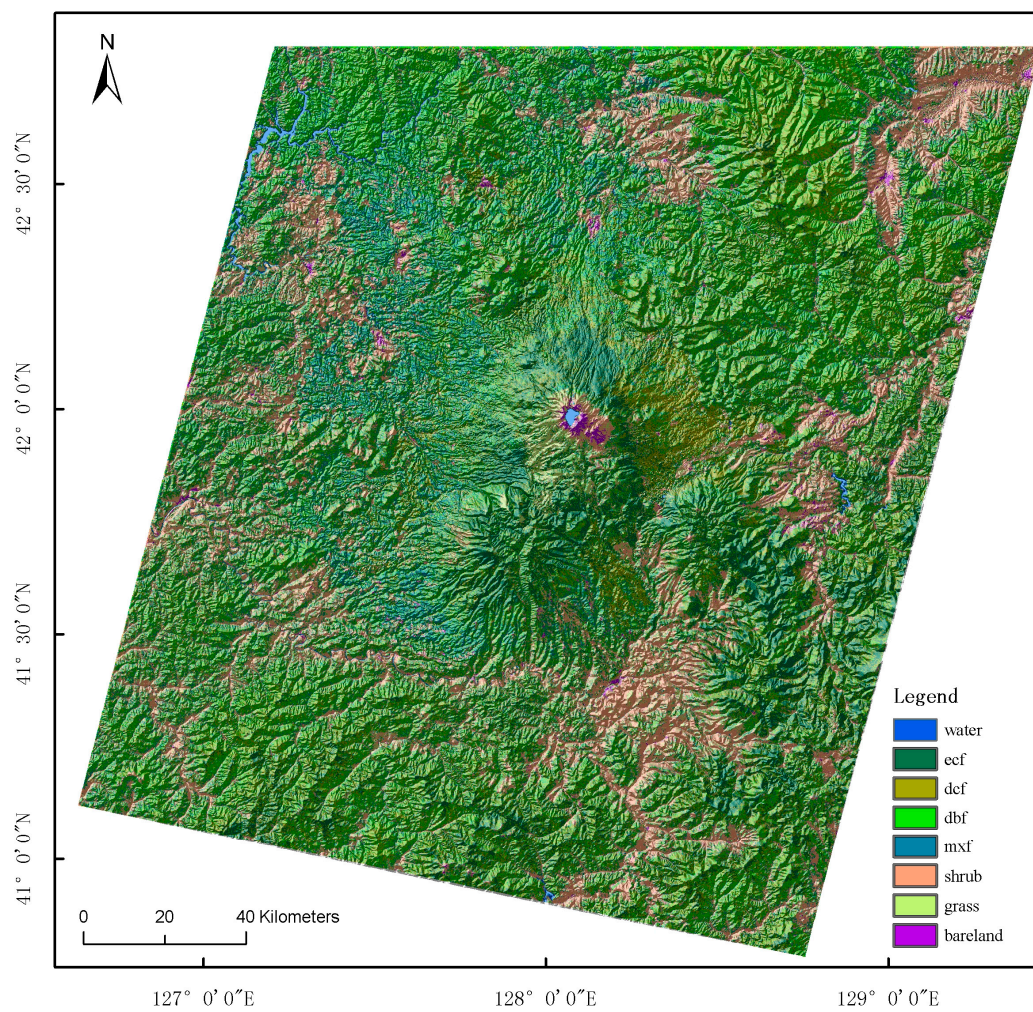

**Figure S1.** Render map of land cover classes.

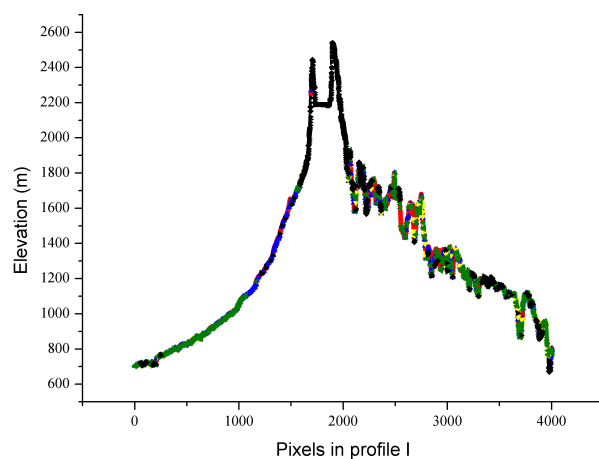

(a)

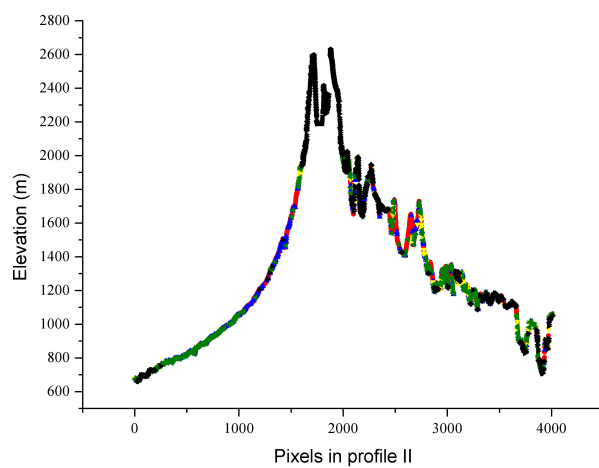

(b)

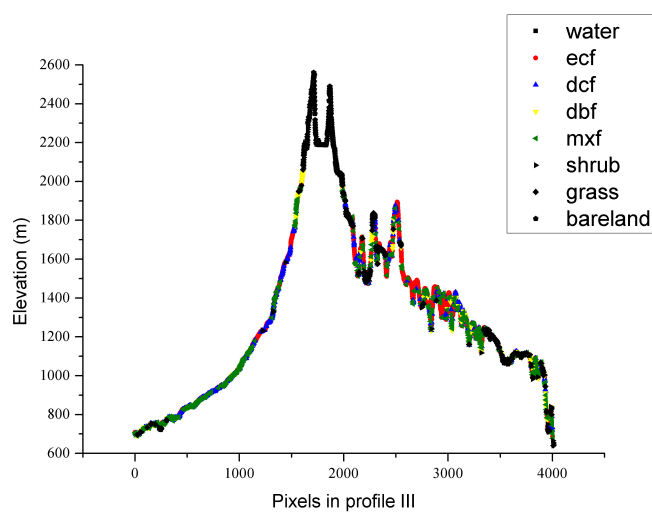

(c)

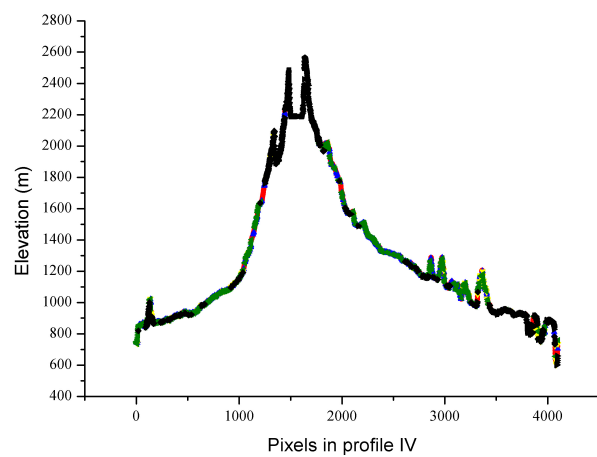

(d)

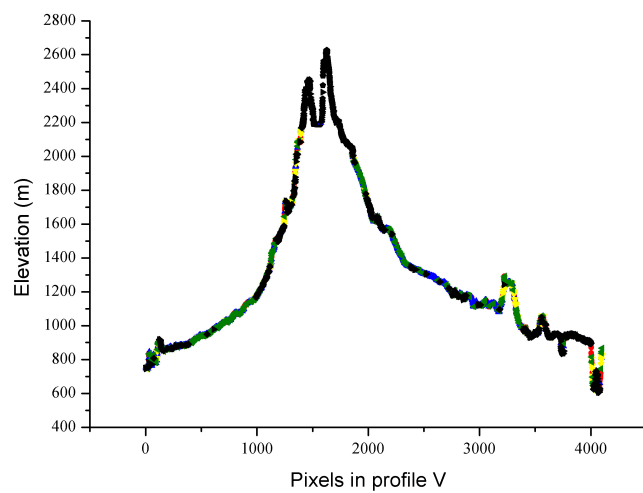

(e)

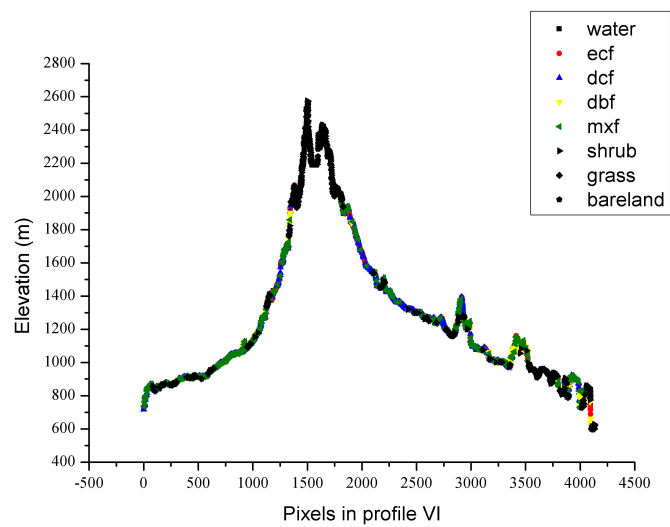

(f)

**Figure S2.** Altitudinal vegetation zones on two profiles of Changbai Mountain: (a)–(c) correspond to profile I–III from the north slope to the south slope; (d)–(f) correspond to profile IV–VI from the west slope to the east slope. In order to clarify the distribution of the vegetation zones, non-forest classes are black in color.
